Type of article: Original

Title of the article: Analysis of Dental Tissues Density in Healthy Children Based on Radiological Data

Running title Dental Tissues Density in Healthy Children

Contributors

1. Reshetnikov Aleksei, PhD, 1) Department of Oral Surgery of Izhevsk State Medical Academy; Izhevsk, Russia, 426034, Kommunarov Str., 281., 2) Department of Oral Surgery Resto Dental Clinic Ltd, Izhevsk, Russia, 426077, K. Liebknecht Str., 26.

ORCID 0000-0002-8710-9724

2. Shaikhattarova Natalia, Resto Dental Clinic Ltd, Department of Pediatric Dentistry, Izhevsk, Russia, 426077, K. Liebknecht Str., 26.

ORCID 0000-0002-5688-0022

3. Mazurok Margarita, Resto Dental Clinic Ltd, Department of Pediatric Dentistry, Izhevsk, Russia, 426077, K. Liebknecht Str., 26.

ORCID 0000-0001-9294-8891

4. Kasatkina Nadezhda, Lobachevsky State University, Department of Dentistry, Nizhny Novgorod, Russia, 603022, Gagarin Avenue, 23.

ORCID 0000-0002-4458-7937

Corresponding Author:

Name Mazurok Margarita

Address Resto Dental Clinic Ltd, Department of Pediatric Dentistry, Izhevsk, Russia, 426077, K. Liebknecht Str., 26

Phone numbers

Facsimile numbers

E-mail address [docmazurok1@gmail.com](mailto:docmazurok1@gmail.com)

Total number of pages:

Total number of photographs:

Word counts

for abstract:

for the text:

Source(s) of support:

Presentation at a meeting:

Organisation

Place

Date

Conflicting Interest (If present, give more details): Nil

Contribution Details (to be ticked marked as applicable):

|                                    | Contributor 1 | Contributor 2 | Contributor 3 | Contributor 4 |
|------------------------------------|---------------|---------------|---------------|---------------|
| Concepts                           | V             |               |               |               |
| Design                             |               | V             |               |               |
| Definition of intellectual content | V             |               |               |               |
| Literature search                  |               |               |               | V             |
| Clinical studies                   |               |               | V             |               |
| Experimental studies               |               |               |               |               |
| Data acquisition                   |               |               | V             |               |
| Data analysis                      |               | V             |               |               |
| Statistical analysis               |               |               |               | V             |
| Manuscript preparation             |               |               | V             |               |
| Manuscript editing                 |               |               |               | V             |
| Manuscript review                  |               | V             |               |               |
| Guarantor                          | V             |               |               |               |

Title of the article: Analysis of Dental Tissues Density in Healthy Children Based on Radiological Data

Abstract:

Introduction: The information about the Hounsfield range values for healthy tooth tissues could become an additional tool in assessing dental health and could be used, among other data, for subsequent machine learning.

Aim: The aim of our study was to determine dental tissues density values in Hounsfield units.

Materials and Methods: The total selection included 36 healthy children (21 girls and 15 boys) with an age range of 6-10 to 11-15 years at the time of the study. The analysis of 320 teeth's tissue density was carried out. The data were expressed as a mean and standard deviation. The significance was determined using the Student's t-test. P-values less than 0.05 were considered significant.

Results: Analysis of the data showed that the tissues of healthy teeth in children have different density ranges. Enamel:  $2954.69 \pm 223.77$  HU -  $2071.00 \pm 222.86$  HU; dentin:  $1899.23 \pm 145.94$  HU -  $1323.10 \pm 201.67$  HU; pulp:  $420.29 \pm 196.47$  HU -  $183.63 \pm 97.59$  HU. No gender differences concerning the density of dental tissues were reliably identified.

Conclusion: The evaluation of Hounsfield values for dental tissues can be used as an objective method for assessing their density. If the determined density values of the enamel, dentin, and pulp of the tooth do not correspond to the range of values for healthy tooth tissues, it may indicate a pathology.

Key-words:Teeth density; Hounsfield unit; Dentistry; Diagnostic imaging

Key Messages:Studying the range of healthy and diseased dental tissues using Hounsfield scores, as well as standardizing studies, can help clinicians improve screening accuracy and optimize follow-up of the effectiveness of preventive and therapeutic interventions in the future.

Text

Introduction: Nowadays, there are clinical, laboratory, and instrumental methods that allow not only to assess the initial condition of dental tissues but also to evaluate their changes during dental treatment.<sup>[1,2]</sup> The monitoring of dental tissue condition is required in trauma, after transplantation, and during therapeutic procedures.<sup>[3,4]</sup> It is especially important for children with metabolic diseases, genetic abnormalities, and children with special needs [5-7]. The use of innovative diagnostic methods provides dentists with new opportunities to assess dental health, especially in the early stages of pathological changes. Recently, cone-beam computed tomography (CBCT) has been widely used in dentistry.<sup>[8]</sup> Unlike traditional orthopantomograms, CBCT allows the clinician to determine tissue density using Hounsfield units (HU).<sup>[9,10]</sup> The information about tissue density for healthy teeth could become an additional tool in assessing dental health, their dental age estimation<sup>[11]</sup> and anatomy<sup>[12]</sup> and could be used, among other data, for subsequent machine learning.<sup>[13]</sup> The results of earlier studies do not provide convincing data on the range of HU for healthy dental tissues in children of a certain age group.<sup>[14,15]</sup> Our study is aimed at establishing Hounsfield values for dental tissues in children of a certain age group.

**Materials and Methods:** The study protocol complied with the principles outlined in the Declaration of Helsinki of the World Health Organization and was approved by the Ethics Committees at Resto Dental Clinic Ltd (protocol number 07, December 22, 2020). Informed consent was obtained from the parents or legal guardians of all children under study. The study was conducted at Resto Dental Clinic Ltd, Izhevsk, Russia, from January 2021 to January 2023. The study included 35 children aged 6-10 and 11-15 of both sexes. The criteria for including children in the study were: 1) the presence of medical indications for CBCT (malocclusion and dental structural anomalies in the primary and permanent dentition, dental trauma, anomalies in dental position); 2) age 11-15 years; 3) consent to the study; and 4) the absence of genetic anomalies and concomitant diseases. Before CBCT, all subjects underwent a clinical study with a visual-tactile method. CBCT studies were performed using a Planmeca ProMax 3D tomograph (PLANMECA OY Asentajankatu 6, Helsinki, Finland) with scanning parameters of 88 kV, 5 mA, and 15 s. Only one expert clinician performed the measurements. PlanmecaRomexis 5.2.R 24.10.18 software was used to analyze the data obtained. The average value of dental tissue density was determined in an area of 1 mm<sup>2</sup>. Teeth of the upper and lower jaws that were selected for the study included: 1st permanent molars, permanent central incisors, 2nd primary molars, tooth germs of 2nd premolars, 2nd premolars, 2nd permanent molars, and tooth germs of 2nd permanent molars. Teeth enamel and dentin density were measured in HU on the incisor/occlusal surface (enamel 1, dentin 1) and proximal surface (enamel 2, dentin 2). The pulp density was measured in its central area (Fig. 1). The data were expressed as a mean and standard deviation.

The significance was determined using the Student's t-test. P-values less than 0.05 were considered significant.

Results: The total sample consisted of 36 healthy children (21 girls and 15 boys, (42%)) aged 6-10 and 11-15 years at the time of the study. The analysis of 320 teeth's tissue density was carried out: 72 1st permanent molars, 72 permanent central incisors, 27 2nd primary molars, 40 tooth germs of 2nd premolars, 37 2nd premolars, 9 2nd permanent molars, and 63 tooth germs of 2nd permanent molars. Analysis of the data showed that the tissues of healthy teeth in children have different density ranges. Enamel:  $2954.69 \pm 223.77$  HU -  $2071.00 \pm 222.86$  HU; dentin:  $1899.23 \pm 145.94$  HU -  $1323.10 \pm 201.67$  HU; pulp:  $420.29 \pm 196.47$  HU -  $183.63 \pm 97.59$  HU. No gender differences concerning the density of dental tissue were reliably identified. Statistical analysis did not reveal any significant relationships between Hounsfield values and demographic data (gender). Therefore, the density values of the tissues of the maxilla and mandible teeth were compared. Detailed data are presented in Table 1.

The tissues (enamel and dentin) of permanent central incisors in the mandible and maxilla had the highest mean density value. The enamel and dentin density of the 2nd primary molars was significantly lower than 2nd permanent molars and tooth germ of 2nd permanent molars.

Discussion: Nowadays, orthopantomograms, together with data from clinical, laboratory, and other instrumental studies, are used by clinicians to assess the condition of hard and soft tissues in the oral cavity in adults and children. However, the information content of orthopantomograms is limited to a 2D image, which may have plane distortions and does not allow accurate assessment of anatomical formations, such as teeth, in terms of their thickness, structure, and density. With the development of computed tomography and software, clinicians acquired an additional tool for determining the density of dental tissues.<sup>[10]</sup> Previous studies of extracted teeth using micro-computed tomography showed an uneven distribution of enamel and dentin density in different areas of the tooth.<sup>[13]</sup> Yavuz<sup>[14]</sup> confirmed this pattern in a mixed age population using CBCT in their study. However, the values of enamel and dentine density in their study were lower than the average values obtained during our study. One of the reasons justifying this difference may be the fact that our study included children of the same age group, which may justify further studies on the dental tissue density in a population of children and adults of certain age groups. The obtained density values for the tissues of tooth germs indicate that they correspond to the density of permanent teeth and exceed similar indicators of the density of primary tooth tissues. We believe that further research on the density range for healthy and pathologically altered dental tissues, as well as studies on standardization, can help clinicians improve the accuracy of screening and optimize subsequent monitoring of the effectiveness of preventive and therapeutic procedures in the future. This study is an attempt to establish a normal range of Hounsfield units for healthy maxillary and mandibular dental tissues in children of a certain age group. The data obtained revealed the density values for enamel, dentin, and pulp for primary and permanent teeth, as well as the germs of primary teeth. Differences in the density of specific teeth were also revealed; in particular, it was found that the enamel of the incisors has the highest density, significantly exceeding the density of the molars. Further research on the density of dental tissues in normal and pathological conditions seems promising, in particular for machine learning.

A limitation of our study is that measurements were carried out by only one expert clinician, which eliminates an assessment of interobserver variability. The study was conducted on a population of children in the same age group. In addition, not all maxillary and mandibular teeth were included in the study. The present study shows Hounsfield values of dental structures associated only with a particularly used CBCT machine. Further studies on a larger population, as well as on other age groups of patients, may be useful to improve the information content of the data.



## Conclusions:

Evaluating Hounsfield values of dental tissues can be used as an objective method for assessing their density. Revealing density values of the enamel, dentin, and pulp of the tooth that do not correspond to the range of values of healthy tooth tissues may indicate their pathology.

## References:

1. Warreth A. Dental Caries and Its Management. *Int J Dent* 2023; 2023:9365845.
2. Anauate-Netto C, Borelli LN, Amore R, DI Hipólito V, D'Alpino PHP. Caries progression in non-cavitated fissures after infiltrant application: a 3-year follow-up of a randomized controlled clinical trial. *J Appl Oral Sci* 2017; 25: 442-54.
3. Elgezawi M, Haridy R, Abdalla MA, Heck K, Draenert M, Kaisarly D. Current Strategies to Control Recurrent and Residual Caries with Resin Composite Restorations: Operator- and Material-Related Factors. *J Clin Med* 2022; 11: 6591.
4. Abdou A, Matoug-Elwerfelli M, Nagendrababu V, Nazzal H, Duggal M. Tooth auto-transplantation: A bibliometric analysis of the top 100 most-cited articles. *Dent Traumatol* 2023; 39: 64-81.
5. Li X, Ye X, Su J. The dental phenotype of primary dentition in SATB2-associated syndrome: a report of three cases and literature review. *BMC Oral Health* 2022; 22: 522.
6. Patni T, Lee CT, Li Y, Kaste S, Zhu L, Sun R, et al. Factors for poor oral health in long-term childhood cancer survivors. *BMC Oral Health* 2023; 23:73.
7. Pecci-Lloret MR, Pecci-Lloret MP, Rodríguez-Lozano FJ. Special Care Patients and Caries Prevalence in Permanent Dentition: A Systematic Review. *Int J Environ Res Public Health* 2022; 19: 15194.
8. Pauwels R, Jacobs R, Singer SR, Mupparapu M. CBCT-based bone quality assessment: are Hounsfield units applicable? *DentomaxillofacRadiol* 2015; 44:20140238.
9. Shapurian T, Damoulis PD, Reiser GM, Griffin TJ, Rand WM. Quantitative evaluation of bone density using the Hounsfield index. *Int J Oral Maxillofac Implants* 2006; 21: 290-7.
10. Mathur VP, Dhillon JK, Logani A, Kalra G. Evaluation of indirect pulp capping using three different materials: A randomized control trial using cone-beam computed tomography. *Indian J Dent Res* 2016; 27: 623-9.
11. Yousefi F, Mohammadi Y, Ahmadvand M, Razaghi P. Dental age estimation using cone-beam computed tomography: A systematic review and meta-analysis. *Imaging Sci Dent.* 2023; 53: 91-9.
12. Almeida JC, Candemil AP, Bertolini GR, Souza-Gabriel AE, Cruz-Filho AM, Sousa-Neto MD, et al. Cone-beam computed tomographic evaluation of the root canal anatomy of the lower premolars and molars in a Brazilian sub-population. *Imaging Sci Dent.* 2023; 53: 77-82.
13. Hung KF, Ai QYH, Leung YY, Yeung AWK. Potential and impact of artificial intelligence algorithms in dento-maxillofacial radiology. *Clin Oral Investig* 2022; 26: 5535-55.

14. Yavuz Y, Akleyin E, Doğan MS, Goncharuk-Khomyn M, Akkus Z. Can the Density of Mineralized Dental Tissues (Dentin and Enamel) Be Measured and Compared with 3D Cone Beam Computed Tomography in Cases of Ectodermal Dysplasia? *Med Sci Monit* 2022; 28: e937003.
15. Hayashi-Sakai S, Sakamoto M, Hayashi T, Kondo T, Sugita K, Sakai J, et al. Evaluation of permanent and primary enamel and dentin mineral density using micro-computed tomography. *Oral Radiol* 2019; 35: 29-34.

Acknowledgement: The authors acknowledge and thank the Professor Aleksandr Urakov (from Izhevsk State Medical Academy) for thanks for all the support.

**Table 1.** Values in Hounsfield units of dental tissues density in healthy children

|                                           | Enamel 1                    | Enamel 2       | Dentin 1       | Dentin 2       |
|-------------------------------------------|-----------------------------|----------------|----------------|----------------|
|                                           | HU, mean±standard deviation |                |                |                |
| <b>1st permanent molars</b>               |                             |                |                |                |
| maxilla (n=36)                            | 2426.28±168.41              | 2358.81±219.60 | 1561.17±143.59 | 1584.11±137.17 |
| mandible (n=36)                           | 2414.53±194.85              | 2336.39±171.98 | 1537.50±150.25 | 1487.19±189.15 |
| * t-statistic                             | 0.2699                      | 0.4756         | 0.6738         | 2.4543         |
| * t crit value                            | 2.0003                      |                |                |                |
| <b>permanentcentralincisors</b>           |                             |                |                |                |
| maxilla (n=36)                            | 2954.69±223.77              | 2592.54±186.54 | 1796.40±163.39 | 1791.91±127.94 |
| mandible (n=36)                           | 2984.20±223.44              | 2552.37±186.85 | 1899.23±145.94 | 1871.69±98.81  |
| t-statistic                               | 0.5521                      | 0.9001         | 2.7769         | 2.9202         |
| t crit value                              | 2.0003                      |                |                |                |
| <b>2nd primarymolars</b>                  |                             |                |                |                |
| maxilla (n=16)                            | 2141.75±246.70              | 2228.53±160.24 | 1428.06±203.41 | 1413.21±145.79 |
| mandible (n=11)                           | 2227.09±115.66              | 2071.00±222.86 | 1323.10±201.67 | 1434.50±144.22 |
| t-statistic                               | 1.2045                      | 1.9976         | 1.2867         | 0.3550         |
| t crit value                              | 2.0595                      | 2.0639         | 2.0639         | 2.0739         |
| <b>tooth germ of 2nd premolars</b>        |                             |                |                |                |
| maxilla (n=21)                            | 2449.71±181.11              | 2509.62±221.56 | 1576.48±126.62 | 1649.71±128.85 |
| mandible (n=19)                           | 2583.68±134.75              | 2611.32±181.89 | 1666.42±138.10 | 1695.74±108.76 |
| t-statistic                               | 2.6698                      | 1.5923         | 2.1394         | 1.2245         |
| t crit value                              | 2.0211                      |                |                |                |
| <b>2nd premolars</b>                      |                             |                |                |                |
| maxilla (n=20)                            | 2220.58±190.65              | 2301.32±193.38 | 1417.30±119.57 | 1507.85±171.50 |
| mandible (n=17)                           | 2336.94±218.79              | 2348.18±103.87 | 1337.00±170.81 | 1375.18±126.17 |
| t-statistic                               | 1.7094                      | 0.9365         | 1.6285         | 2.7042         |
| t crit value                              | 2.0211                      |                |                |                |
| <b>2nd permanent molars</b>               |                             |                |                |                |
| maxilla (n=4)                             | 2350.00±49.02               | 2403.50±101.93 | 1569.00±88.75  | 1523.25±91.31  |
| mandible (n=5)                            | 2293.40±131.28              | 2174.40±145.79 | 1443.00±70.81  | 1327.60±121.99 |
| t-statistic                               | 0.8897                      | 2.7734         | 2.3111         | 2.7502         |
| t crit value                              | 2.3646                      |                |                |                |
| <b>tooth germ of 2nd permanent molars</b> |                             |                |                |                |
| maxilla (n=32)                            | 2359.03±169.39              | 2403.16±209.89 | 1527.03±121.39 | 1519.66±105.13 |
| mandible (n=31)                           | 2356.52±148.88              | 2499.97±178.51 | 1527.81±128.91 | 1554.37±120.88 |
| t-statistic                               | 0.0625                      | 1.9741         | 0.0247         | 1.2031         |
| t crit value                              | 2.0423                      |                |                |                |

\*The differences are significant at t-statistic>t critical value at p=0.05. \*\*t crit value - t critical value
